# Supplementary material for: Structural basis for ineffective T-cell responses to MHC anchor residue-improved “heteroclitic” peptides
Source: PubMed Central journal article supplement (PMC4357396; doi:10.1002/eji.201445114), 2014-12-28
Supplement: eji0045-0584-sd1.pdf [file eji0045-0584-sd1.pdf]

# European Journal of Immunology

**Supporting Information**

**for**

**DOI 10.1002/eji.201445114**

Florian Madura, Pierre J. Rizkallah, Christopher J. Holland, Anna Fuller,  
Anna Bulek, Andrew J. Godkin, Andrea J. Schauenburg, David K. Cole  
and Andrew K. Sewell

**Structural basis for ineffective T-cell responses to MHC anchor  
residue-improved “heteroclitic” peptides**

## Supporting Information

Structural basis for ineffective T-cell responses to MHC anchor residue-improved 'heteroclitic' peptides

**Florian Madura<sup>1</sup>, Pierre J. Rizkallah<sup>1</sup>, Christopher J. Holland<sup>1</sup>, Anna Fuller<sup>1</sup>, Anna Bulek<sup>1</sup>, Andrew J Godkin<sup>1</sup>, Andrea A.J. Schauenburg<sup>1</sup>, David K. Cole<sup>1\*</sup> and Andrew K. Sewell<sup>1\*</sup>**

<sup>1</sup>Cardiff University School of Medicine, Heath Park, Cardiff, CF14 4XN, UK.

\*These authors contributed equally to this study

Running title: Altered anchoring of peptide to MHC changes TCR binding

To whom correspondence should be addressed: Professor Andrew Sewell, E-mail: [sewellak@cf.ac.uk](mailto:sewellak@cf.ac.uk).

Tel: +442920687055, or Dr David Cole, E-mail: [coledk@cf.ac.uk](mailto:coledk@cf.ac.uk). Tel: +442920687006

**Keywords:** MART-1, Melan-A, melanoma, crystal structure, peptide-major histocompatibility complex (pMHC), surface plasmon resonance (SPR), T-cell, T-cell receptor (TCR), cross-reactivity.

**Non-standard abbreviations:** pMHC, peptide-major histocompatibility complex; RU, response unit; SPR, surface plasmon resonance.

**Supplementary Table S1:** MEL5-A2-EAA. 3.4Å cut-off for H-bonds, 3.4Å cut-off for salt bridges and 4Å cut-off for vdW.

| Peptide                 | TCR                       | H-bonds ( $\leq 3.4\text{\AA}$ ) | vdW (3.2Å–4Å) |
|-------------------------|---------------------------|----------------------------------|---------------|
| Glu1 <sup>Oε2</sup>     | αGlv29 <sup>O</sup>       | 1                                | 3             |
| Glu1 <sup>Oε2</sup>     | αGln31 <sup>Ne2</sup>     | 1 salt bridge                    | 1             |
| Ala2 <sup>O</sup>       | αGln31 <sup>Ne2</sup>     | 1                                |               |
| Ala3                    | αGln31                    |                                  | 1             |
| Gly4 <sup>N</sup>       | αGln31 <sup>Oε1</sup>     | 1                                | 6             |
| Gly4                    | βLeu98                    |                                  | 3             |
| Ile5                    | αGln31                    |                                  | 2             |
| Ile5                    | αSer32                    |                                  | 1             |
| Ile5                    | αAsn92                    |                                  | 1             |
| Ile5                    | βLeu98                    |                                  | 2             |
| Ile5                    | βGly99                    |                                  | 3             |
| Gly6 <sup>N</sup>       | βLeu98 <sup>O</sup>       | 1                                | 2             |
| Ile7                    | βGly97                    |                                  | 2             |
| Ile7 <sup>O</sup>       | βLeu98 <sup>N</sup>       | 1                                | 9             |
| Leu8                    | βGly99                    |                                  | 2             |
| Thr9                    | βThr96                    |                                  | 1             |
| MHC                     | TCR                       | H-bonds ( $\leq 3.4\text{\AA}$ ) | vdW (3.2Å–4Å) |
| Glv62                   | αAla94                    |                                  | 3             |
| Arg65 <sup>Ne/NH2</sup> | αAla94 <sup>O</sup>       | 2                                | 6             |
| Arg65                   | αLys96                    |                                  | 3             |
| Arg65                   | βTyr49                    |                                  | 6             |
| Arg65 <sup>NH1</sup>    | βGlu59 <sup>Oε1/Oε2</sup> | 2 salt bridge                    | 2             |
| Lys66                   | αGln31                    |                                  | 1             |
| Lys66                   | βLeu98                    |                                  | 1             |
| Lys68                   | βTyr49                    |                                  | 2             |
| Ala69                   | βLeu98                    |                                  | 4             |
| His70                   | βLeu98                    |                                  | 1             |
| Gln72                   | βVal51                    |                                  | 2             |
| Thr73                   | βGly97                    |                                  | 2             |
| Val76                   | βAsn30                    |                                  | 4             |
| His151                  | αTyr51                    |                                  | 1             |
| Glu154                  | αTyr51                    |                                  | 3             |
| Gln155                  | αTyr51                    |                                  | 5             |
| Gln155                  | βGly99                    |                                  | 2             |
| Gln155 <sup>Oε1</sup>   | βThr100 <sup>N</sup>      | 1                                | 5             |
| Ala158                  | αTyr51                    |                                  | 2             |
| Tyr159                  | αGln31                    |                                  | 3             |
| Thr163                  | αGln31                    |                                  | 3             |
| Glu166 <sup>Oε2</sup>   | αArg28 <sup>NH2</sup>     | 1 salt bridge                    | 2             |
| Trp167                  | αArg28                    |                                  | 1             |
| Trp167                  | αGly29                    |                                  | 1             |

**Supplementary Table 2:** MEL5-A2-ELA (1). 3.4Å cut-off for H-bonds, 3.4Å cut-off for salt bridges and 4Å cut-off for vdW.

| Peptide                                   | TCR                                               | H-bonds ( $\leq 3.4\text{\AA}$ ) | vdW ( $3.2\text{\AA}-4\text{\AA}$ ) |
|-------------------------------------------|---------------------------------------------------|----------------------------------|-------------------------------------|
| Glu1                                      | $\alpha$ Glv29                                    |                                  | 1                                   |
| Glu1                                      | $\alpha$ Gln31                                    |                                  | 1                                   |
| Ala3                                      | $\alpha$ Gln31                                    |                                  | 1                                   |
| Ala3                                      | $\beta$ Leu98                                     |                                  | 1                                   |
| Gly4 <sup>N</sup>                         | $\alpha$ Gln31 <sup>O<math>\epsilon</math>1</sup> | 1                                | 5                                   |
| Gly4 <sup>O</sup>                         | $\alpha$ Asn92 <sup>N<math>\delta</math>2</sup>   | 1                                |                                     |
| Gly4                                      | $\beta$ Leu98                                     |                                  | 3                                   |
| Ile5                                      | $\alpha$ Gln31                                    |                                  | 1                                   |
| Ile5                                      | $\alpha$ Ser32                                    |                                  | 1                                   |
| Ile5                                      | $\alpha$ Tyr51                                    |                                  | 1                                   |
| Ile5                                      | $\alpha$ Asn92                                    |                                  | 1                                   |
| Ile5                                      | $\beta$ Leu98                                     |                                  | 2                                   |
| Ile5                                      | $\beta$ Gly99                                     |                                  | 6                                   |
| Gly6                                      | $\beta$ Gly99                                     |                                  | 2                                   |
| Ile7 <sup>O</sup>                         | $\beta$ Leu98 <sup>N</sup>                        | 1                                | 4                                   |
| Ile7                                      | $\beta$ Gly99                                     |                                  | 1                                   |
| Leu8                                      | $\beta$ Gly99                                     |                                  | 2                                   |
| Thr9                                      | $\beta$ Thr96                                     |                                  | 1                                   |
| MHC                                       | TCR                                               | H-bonds ( $\leq 3.4\text{\AA}$ ) | vdW ( $3.2\text{\AA}-4\text{\AA}$ ) |
| Glv62                                     | $\alpha$ Ala94                                    |                                  | 2                                   |
| Arg65 <sup>N<math>\epsilon</math></sup>   | $\alpha$ Ala94 <sup>O</sup>                       | 1                                | 5                                   |
| Arg65                                     | $\alpha$ Lys96                                    |                                  | 2                                   |
| Arg65 <sup>NH1</sup>                      | $\beta$ Glu59 <sup>O<math>\epsilon</math>1</sup>  | 1 salt bridge                    | 1                                   |
| Lys66                                     | $\alpha$ Gln31                                    |                                  | 1                                   |
| Lys68                                     | $\beta$ Val51                                     |                                  | 1                                   |
| Gln72                                     | $\beta$ Val51                                     |                                  | 3                                   |
| Thr73                                     | $\beta$ Gly97                                     |                                  | 2                                   |
| Val76                                     | $\beta$ Asn30                                     |                                  | 3                                   |
| Val76                                     | $\beta$ Thr96                                     |                                  | 1                                   |
| Glu154                                    | $\alpha$ Tyr51                                    |                                  | 3                                   |
| Gln155                                    | $\alpha$ Tyr51                                    |                                  | 5                                   |
| Gln155                                    | $\beta$ Gly99                                     |                                  | 2                                   |
| Gln155 <sup>O<math>\epsilon</math>1</sup> | $\beta$ Thr100 <sup>N</sup>                       | 1                                | 7                                   |
| Ala158                                    | $\alpha$ Tyr51                                    |                                  | 2                                   |
| Tyr159                                    | $\alpha$ Gln31                                    |                                  | 4                                   |
| Thr163                                    | $\alpha$ Gln31                                    |                                  | 4                                   |
| Glu166 <sup>O<math>\epsilon</math>2</sup> | $\alpha$ Arg28 <sup>NH2</sup>                     | 1 salt bridge                    | 2                                   |
| Trp167                                    | $\alpha$ Gly29                                    |                                  | 3                                   |

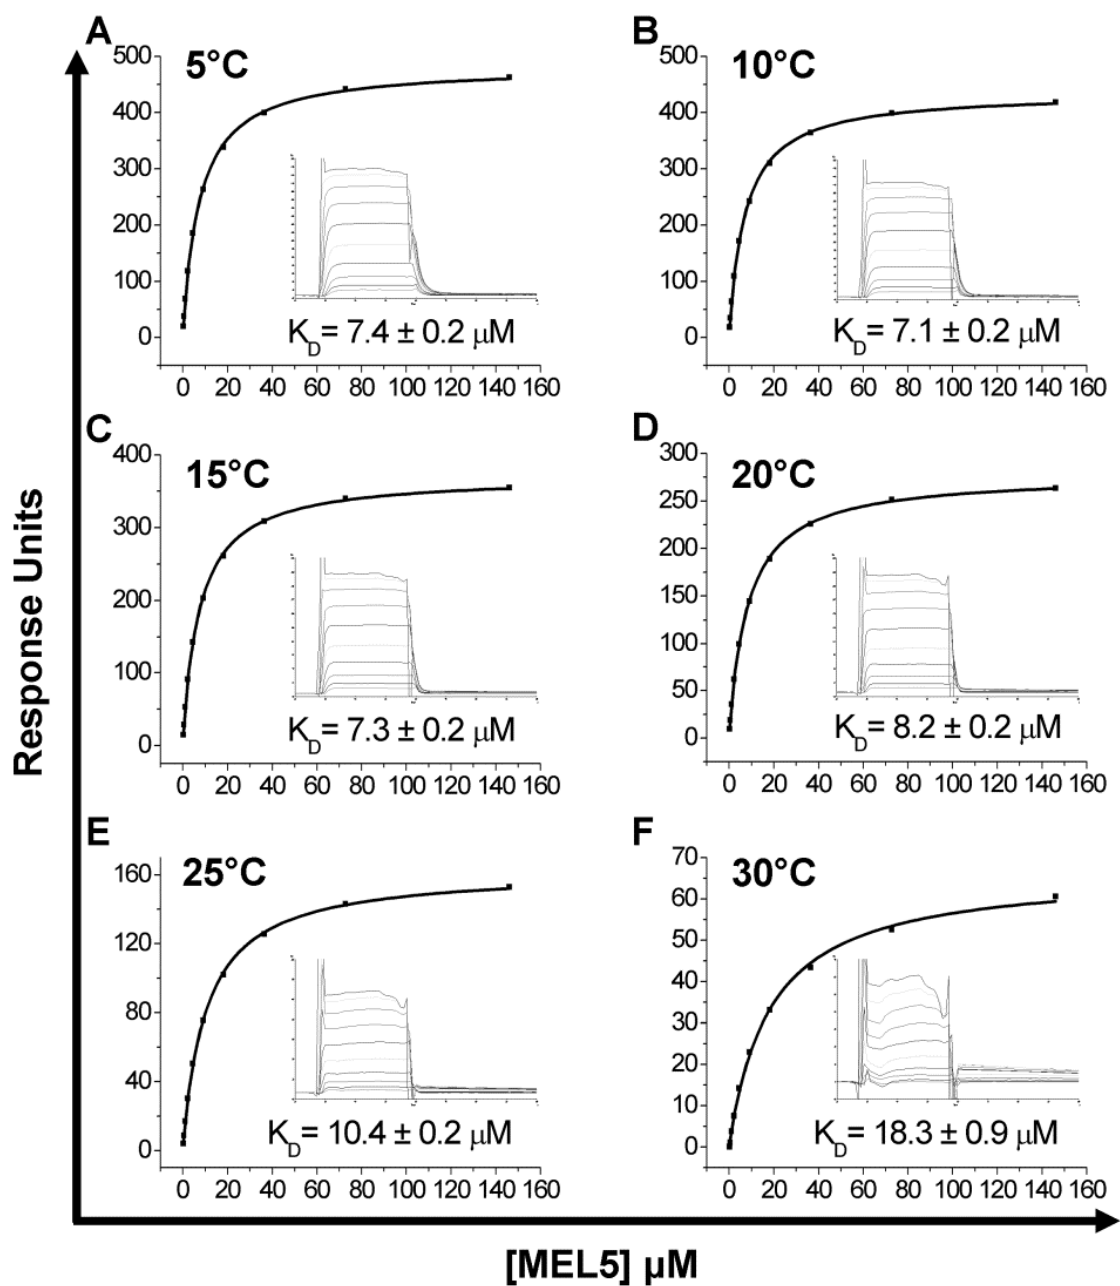

**Supplementary Figure S1. Thermodynamic analysis of the MEL5 interaction with A2-EAA.**

Thermodynamic analysis of the MEL5-A2-EAA interaction was performed by SPR. Ten serial dilutions of MEL5 were measured in triplicate at (A) 5°C, (B) 10°C, (C) 15°C, (D) 20°C, (E) 25°C and (F) 30°C; representative data from one of these experiments is plotted. The equilibrium binding constant ( $K_D$ ) values were calculated using a nonlinear curve fit (Langmuir binding equation  $AB = (B \times AB_{\max}) / (K_D + B)$ ); mean plus SD values are shown. These data were used to fit thermodynamic parameters shown in Figure 1.
